# Supplementary material for: Intermetallic Pd3Pb ultrathin nanoplate-constructed flowers with low-coordinated edge sites boost oxygen reduction performance
Source: Royal Society of Chemistry journal article supplement (doi:10.1039/c9nr04021h), 2019-01-01
Supplement: c9nr04021h1.pdf [file c9nr04021h1.pdf]

## Supporting Information

### **Intermetallic Pd<sub>3</sub>Pb ultrathin nanoplate-constructed flowers with low-coordinated edge sites boost oxygen reduction performance**

*Sai Luo,<sup>a</sup> Yang Ou,<sup>a</sup> Lei Li,<sup>a</sup> Junjie Li,<sup>a</sup> Xingqiao Wu, Yi Jiang,<sup>a</sup> Mingxi Gao,<sup>a</sup> Xiaofang Yang,<sup>b,\*</sup>*

*Hui Zhang,<sup>a,\*</sup> Deren Yang<sup>a</sup>*

*<sup>a</sup>State Key Laboratory of Silicon Materials, School of Materials Science and Engineering, Zhejiang University, Hangzhou, Zhejiang 310027, People's Republic of China. Email: msezhanghui@zju.edu.cn*

*<sup>b</sup>College of Materials Science and Engineering, Chongqing University, Chongqing 400044, People's Republic of China. Email: yangxf@cqu.edu.cn*

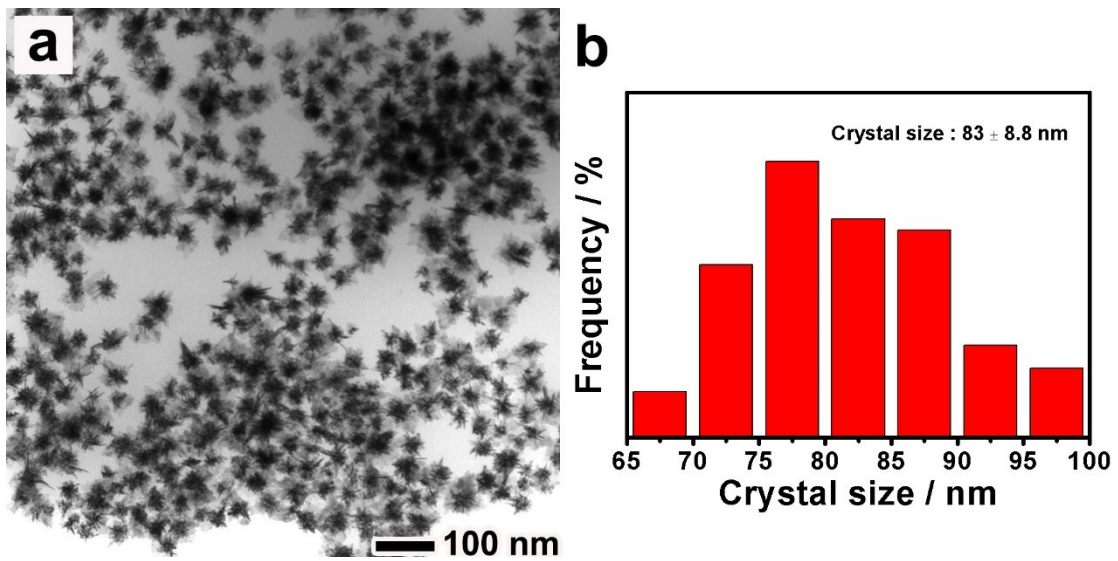

**Figure S1.** (a) Representative TEM images of the Pd<sub>3</sub>Pb nanoflowers at low magnification and (b) the corresponding size distribution.

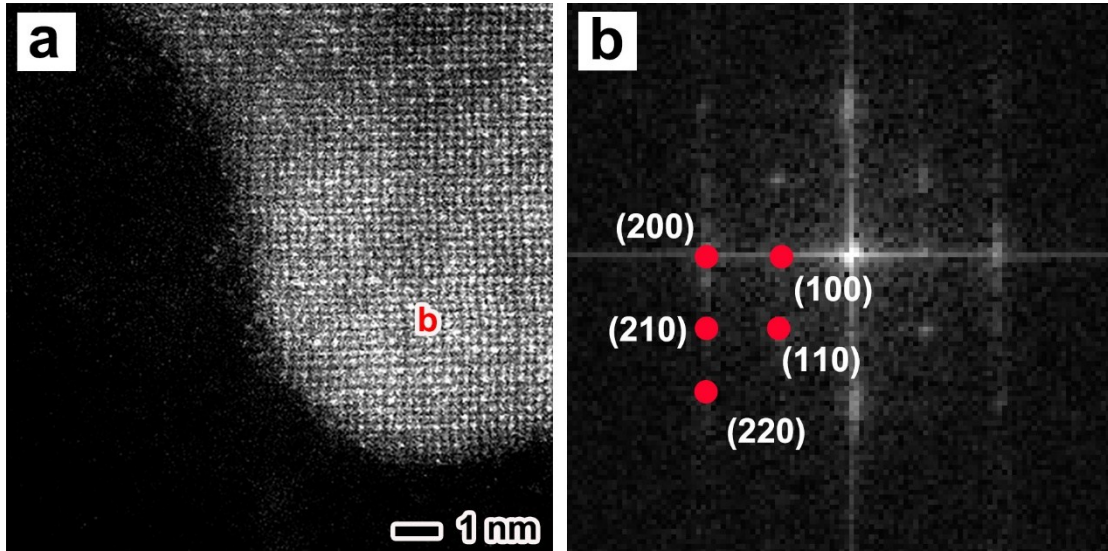

**Figure S2.** (a) HADDF-STTEM image of the Pd<sub>3</sub>Pb nanoflowers at a higher magnification. (b) FFT pattern converted from the selected area in (a).

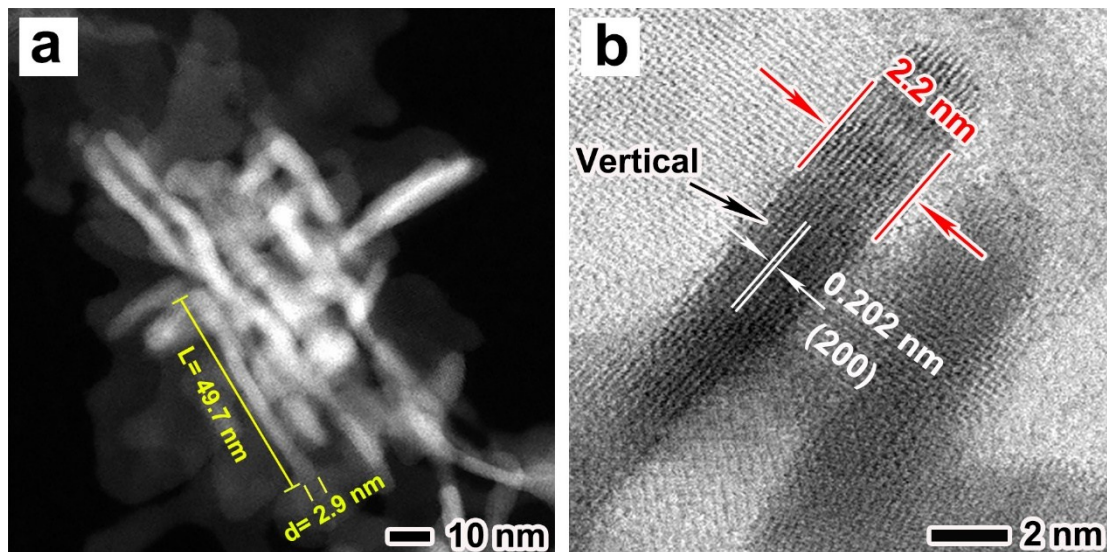

**Figure S3.** (a) HADDF image of the Pd<sub>3</sub>Pb nanoflowers and (b) HRTEM image of the vertically upstanding nanoplates in the Pd<sub>3</sub>Pb nanoflowers.

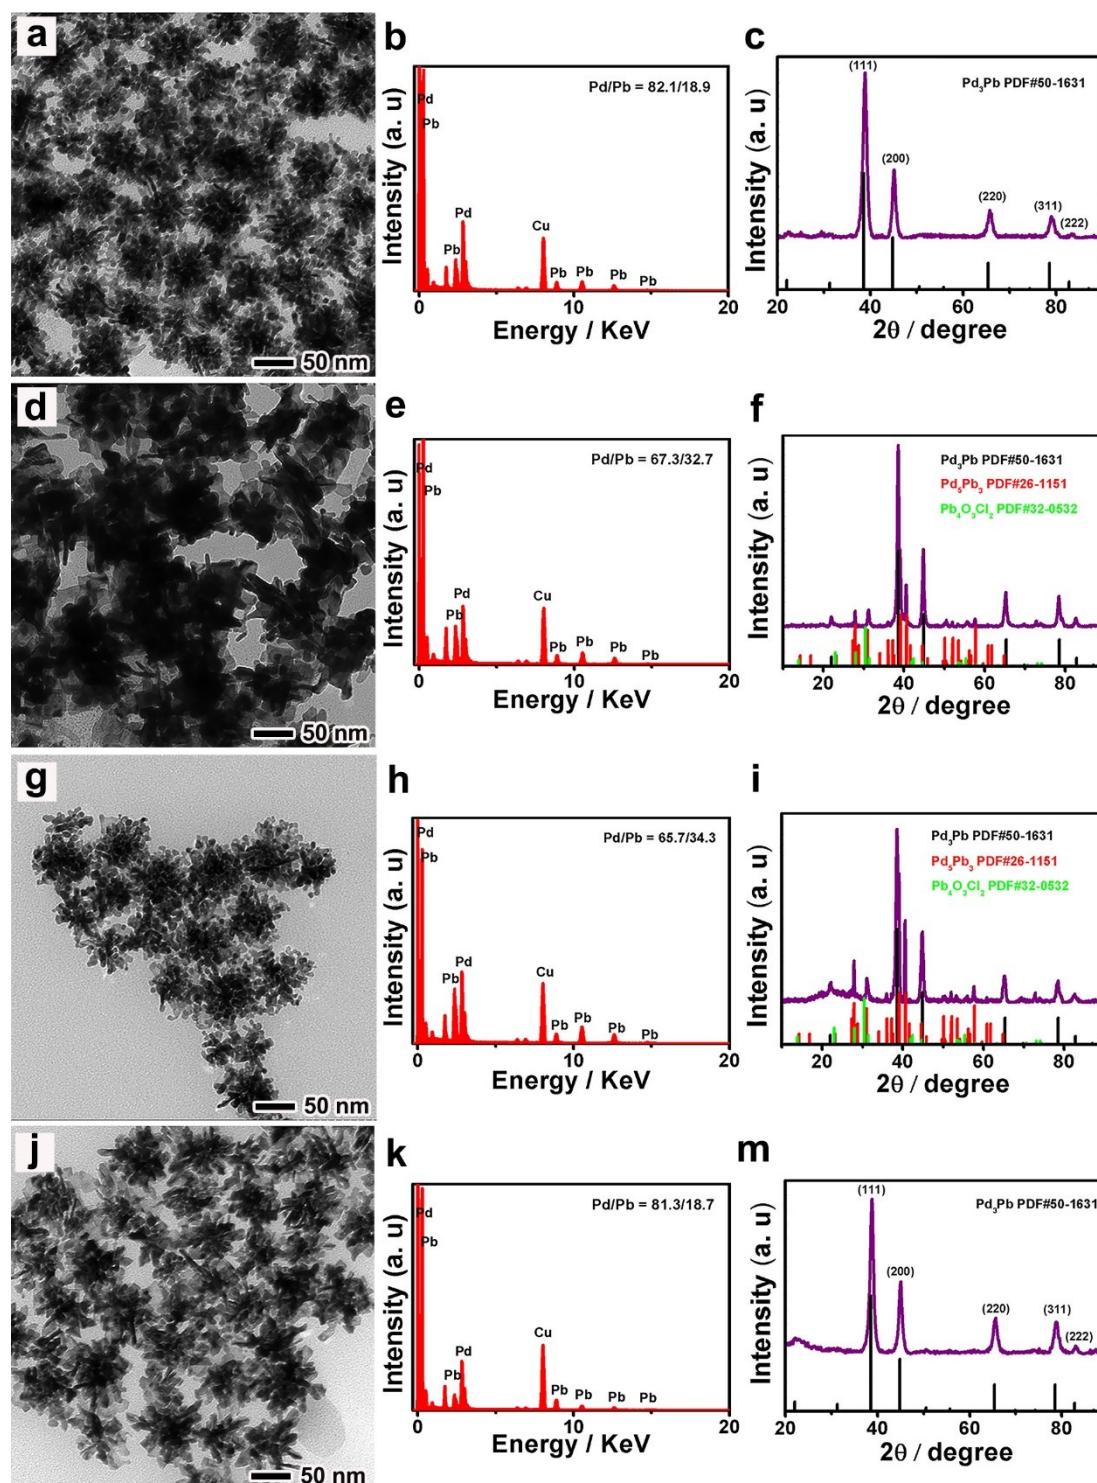

**Figure S4.** TEM images, EDX spectra and XRD patterns of the products prepared by using the standard procedure except the use of (a, b, c) 0.12 mmol Pd(acac)<sub>2</sub> and 0.02 mmol Pb(acac)<sub>2</sub>, (d, e, f) 0.03 mmol Pd(acac)<sub>2</sub> and 0.02 mmol Pb(acac)<sub>2</sub>, (g, h, i) 0.06 mmol Pd(acac)<sub>2</sub> and 0.04 mmol Pb(acac)<sub>2</sub>, and (j, k, m) 0.06 mmol Pd(acac)<sub>2</sub> and 0.01 mmol Pb(acac)<sub>2</sub>.

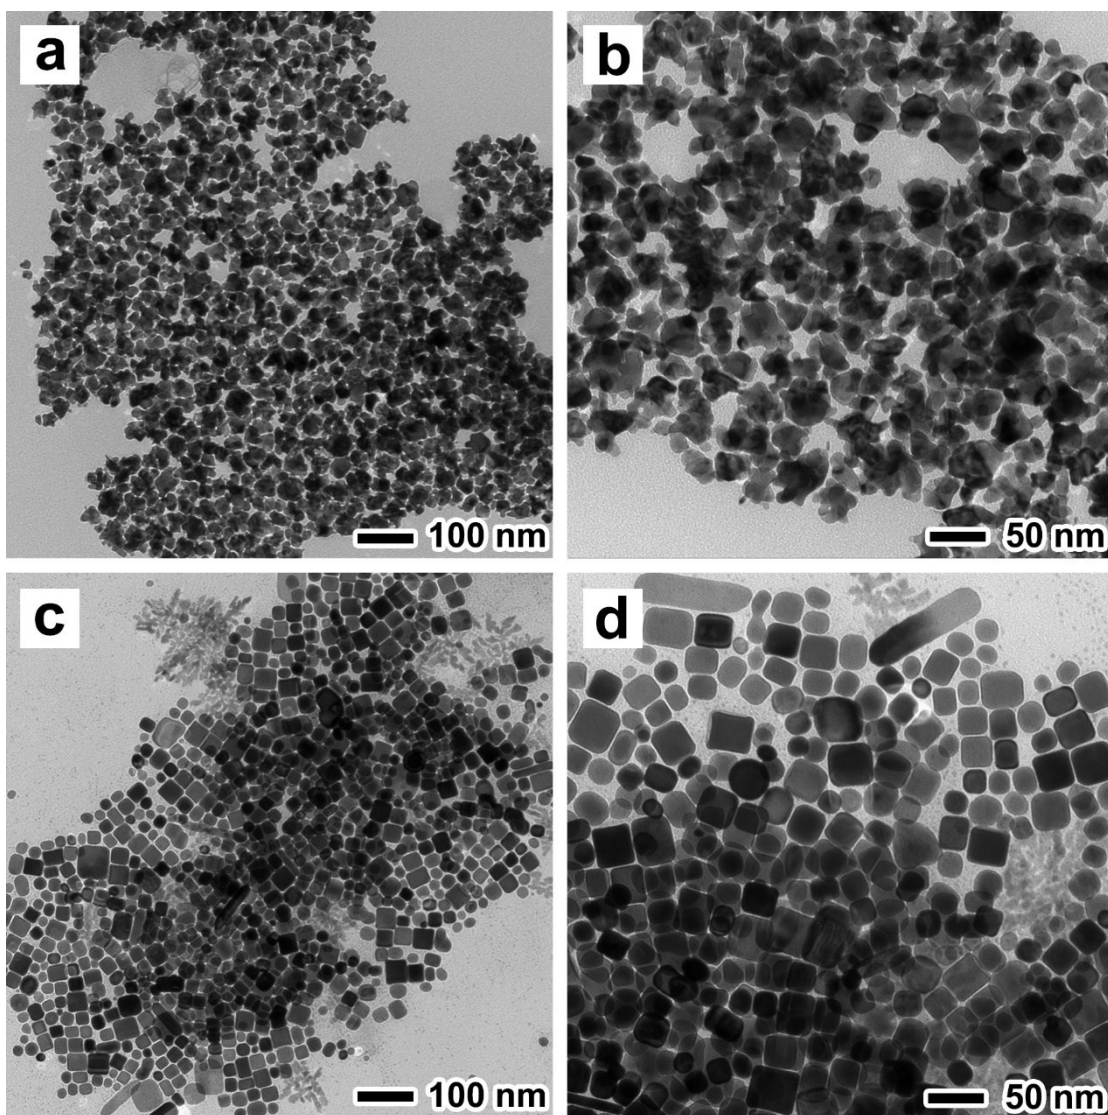

**Figure S5.** Representative TEM images of the products with the same conditions as those of Pd<sub>3</sub>Pb nanoflowers but replacing 30 mg of AA with (a, b) 30 mg of glucose and (c, d) 30 mg of CA, respectively.

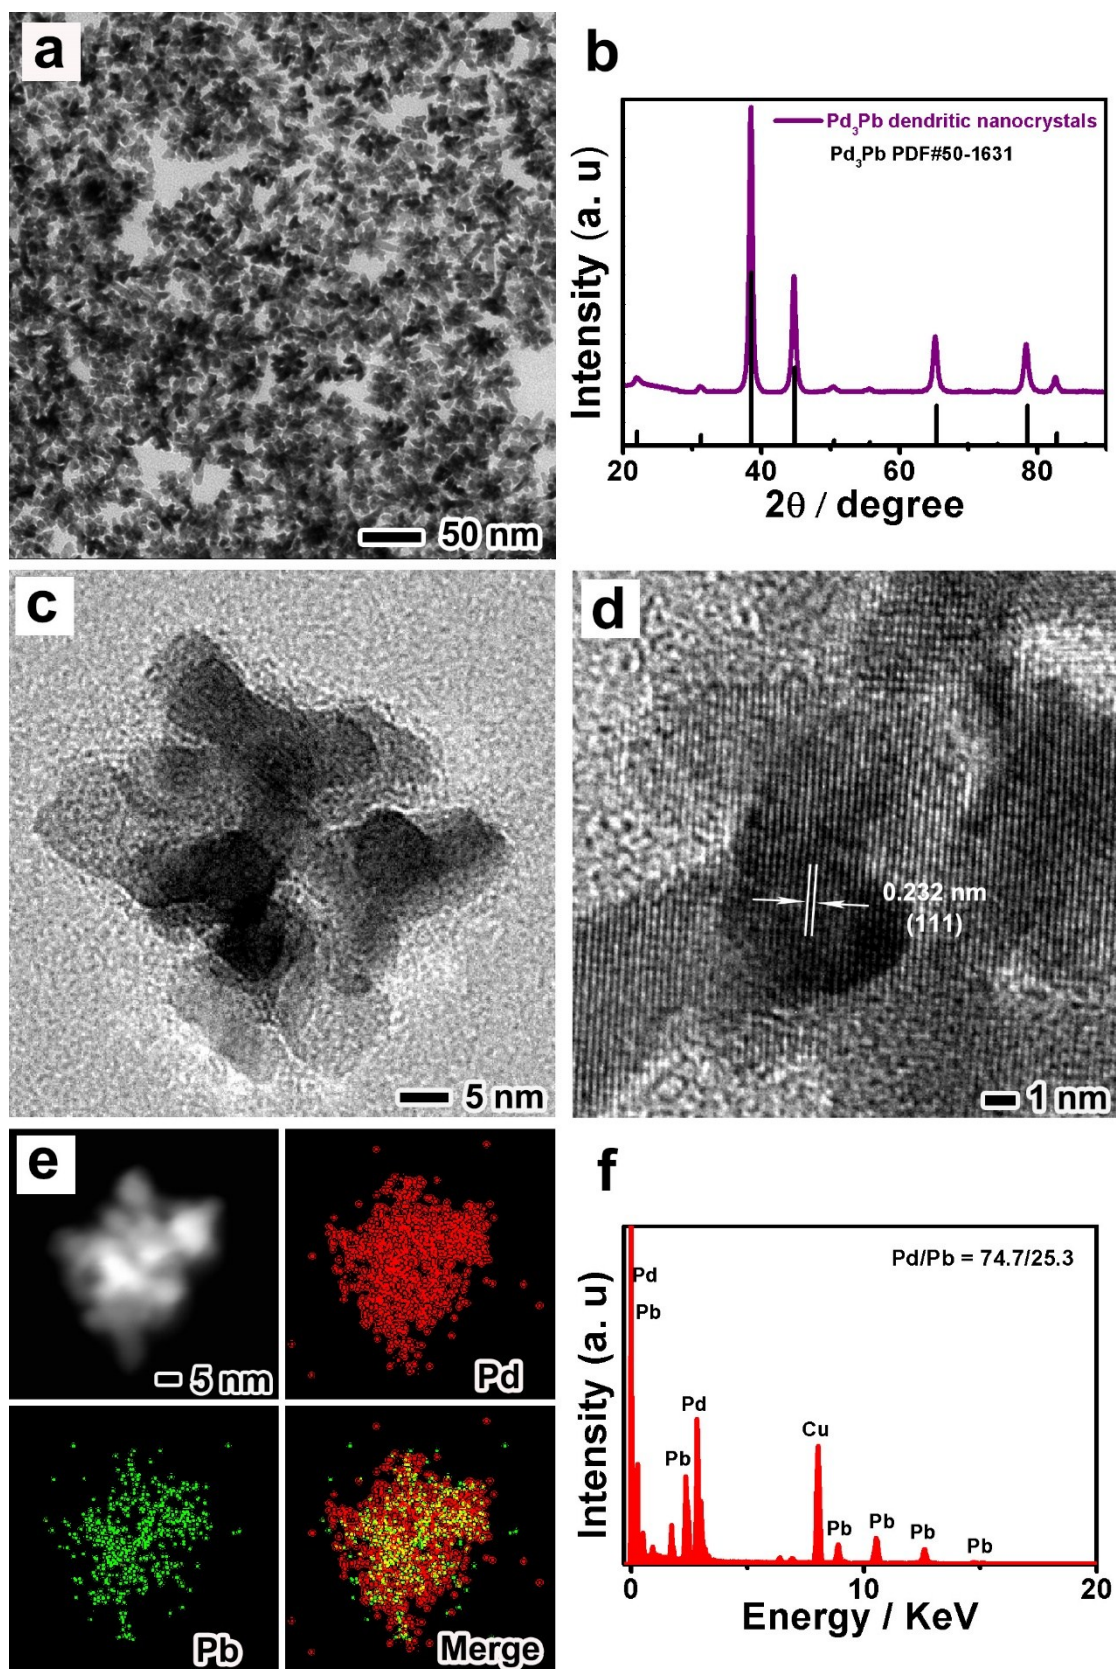

**Figure S6.** (a) TEM image, (b) XRD pattern, (c,d) HRTEM images, (e) EDX-mapping and (f) EDX spectrum of the Pd<sub>3</sub>Pb dendritic nanocrystals prepared by using the standard procedure for the synthesis of the Pd<sub>3</sub>Pb nanoflowers in the absence of

CTAC.

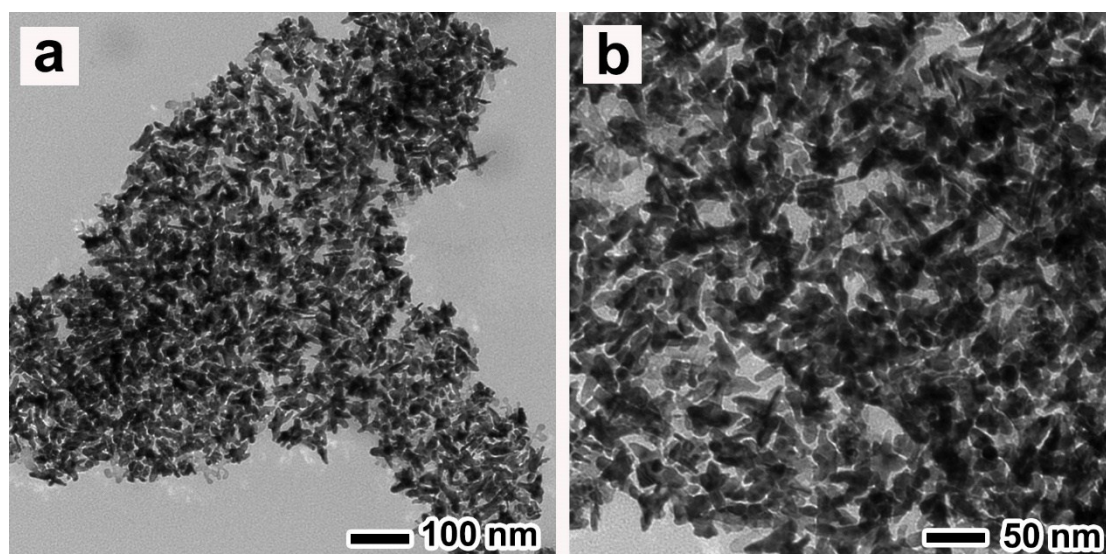

**Figure S7.** Representative TEM images of the products prepared by using the standard procedure for the synthesis of the Pd<sub>3</sub>Pb nanoflowers except for replacing 40 mg of CTAC with 40 mg of CTAB.



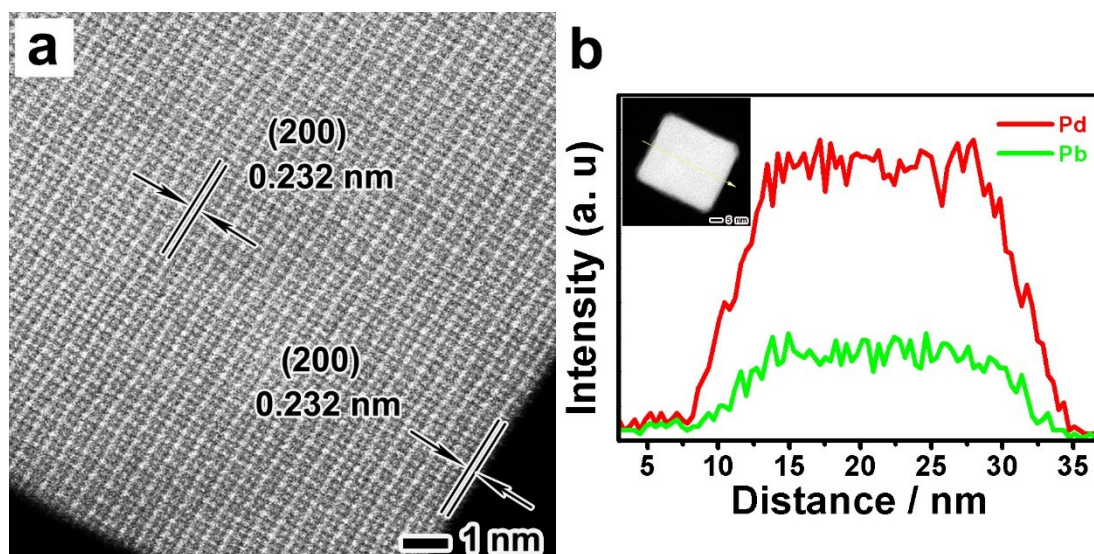

**Figure S8.** (a) Atomic-resolution HAADF-STEM image and (b) EDX line-scan profile of the Pd<sub>3</sub>Pb nanocubes. The inset in (b) shows the corresponding HAADF-STEM images.

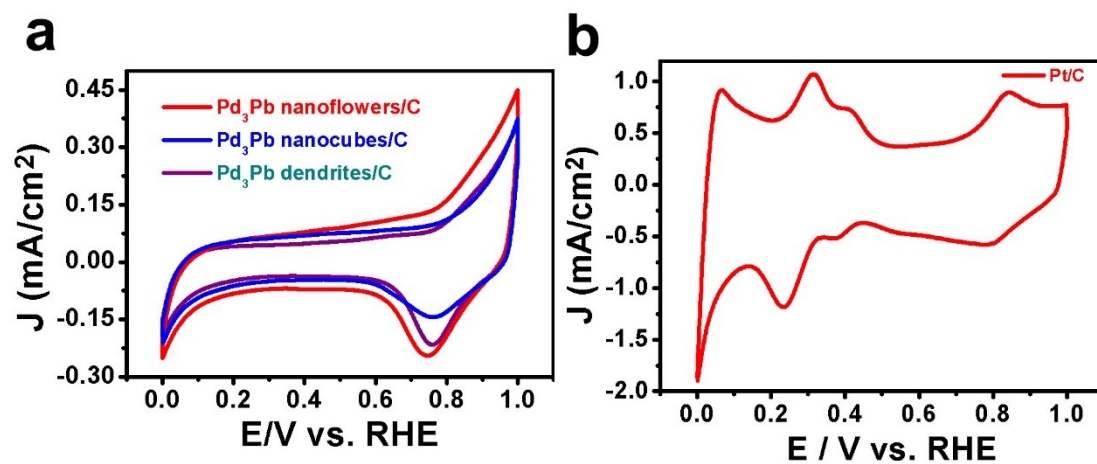

**Figure S9.** The cyclic voltammetry (CV) curves of (a) the Pd<sub>3</sub>Pb nanoflowers/C, Pd<sub>3</sub>Pb nanocubes/C and Pd<sub>3</sub>Pb dendrites/C, and (b) commercial Pt/C in Ar-purged 0.1 M KOH solutions at a sweep rate of 50 mV/s.

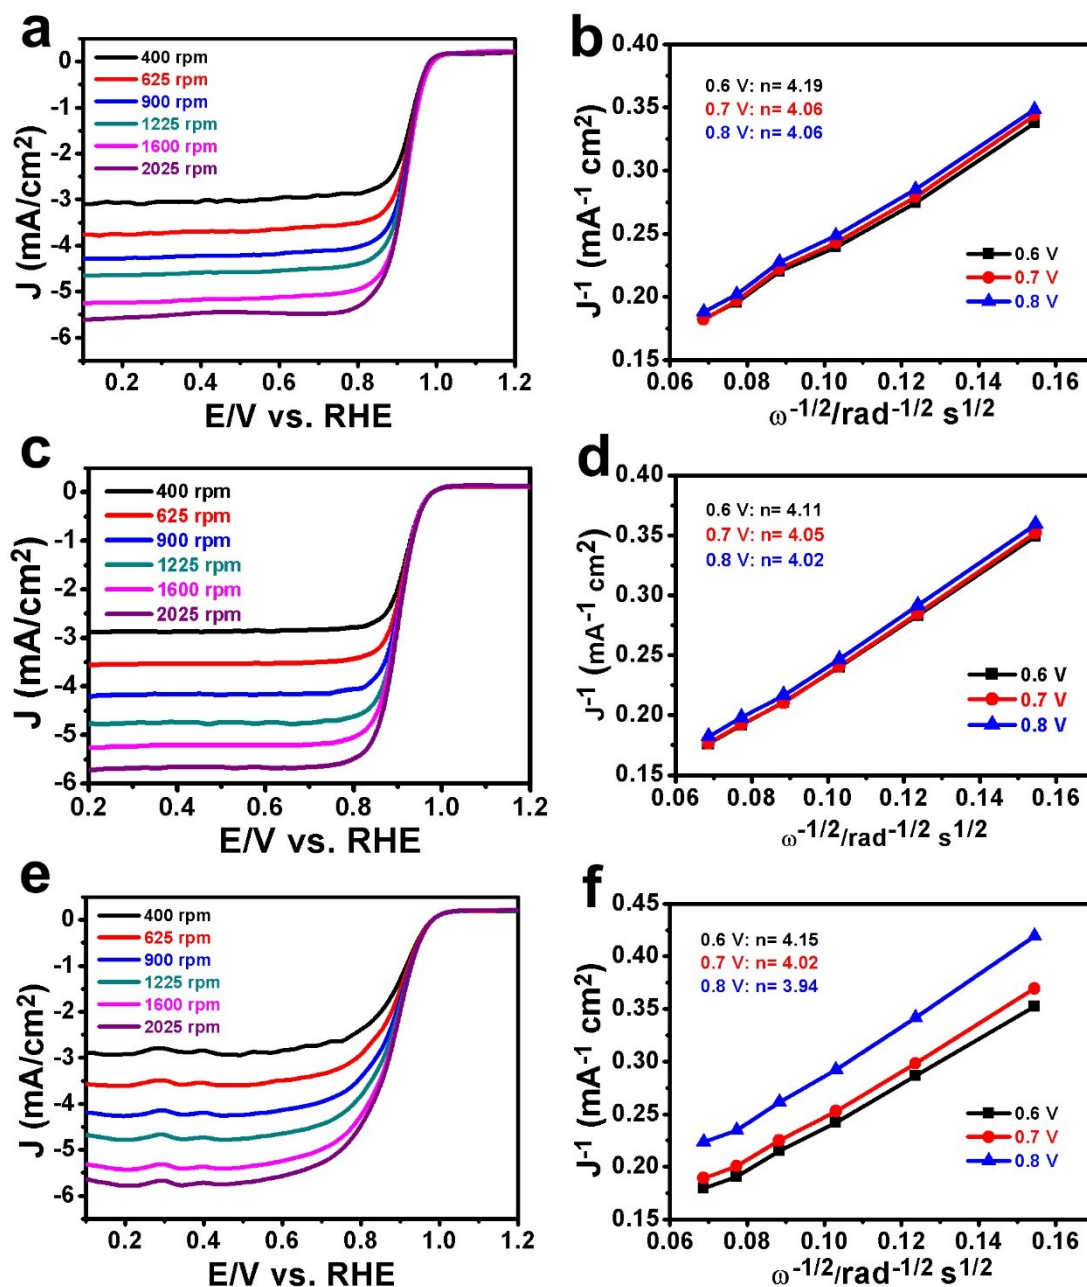

**Figure S10.** (a, c, e) Rotating-disk voltammograms of intermetallic Pd<sub>3</sub>Pb nanocubes/C, Pd<sub>3</sub>Pb dendrites/C and commercial Pt/C in O<sub>2</sub>-saturated 0.1 M KOH at different rotation rates with a sweep rate of 10 mV s<sup>-1</sup>. (b, d, f) The corresponding Koutechy-Levich plots of figure (a, c, e).

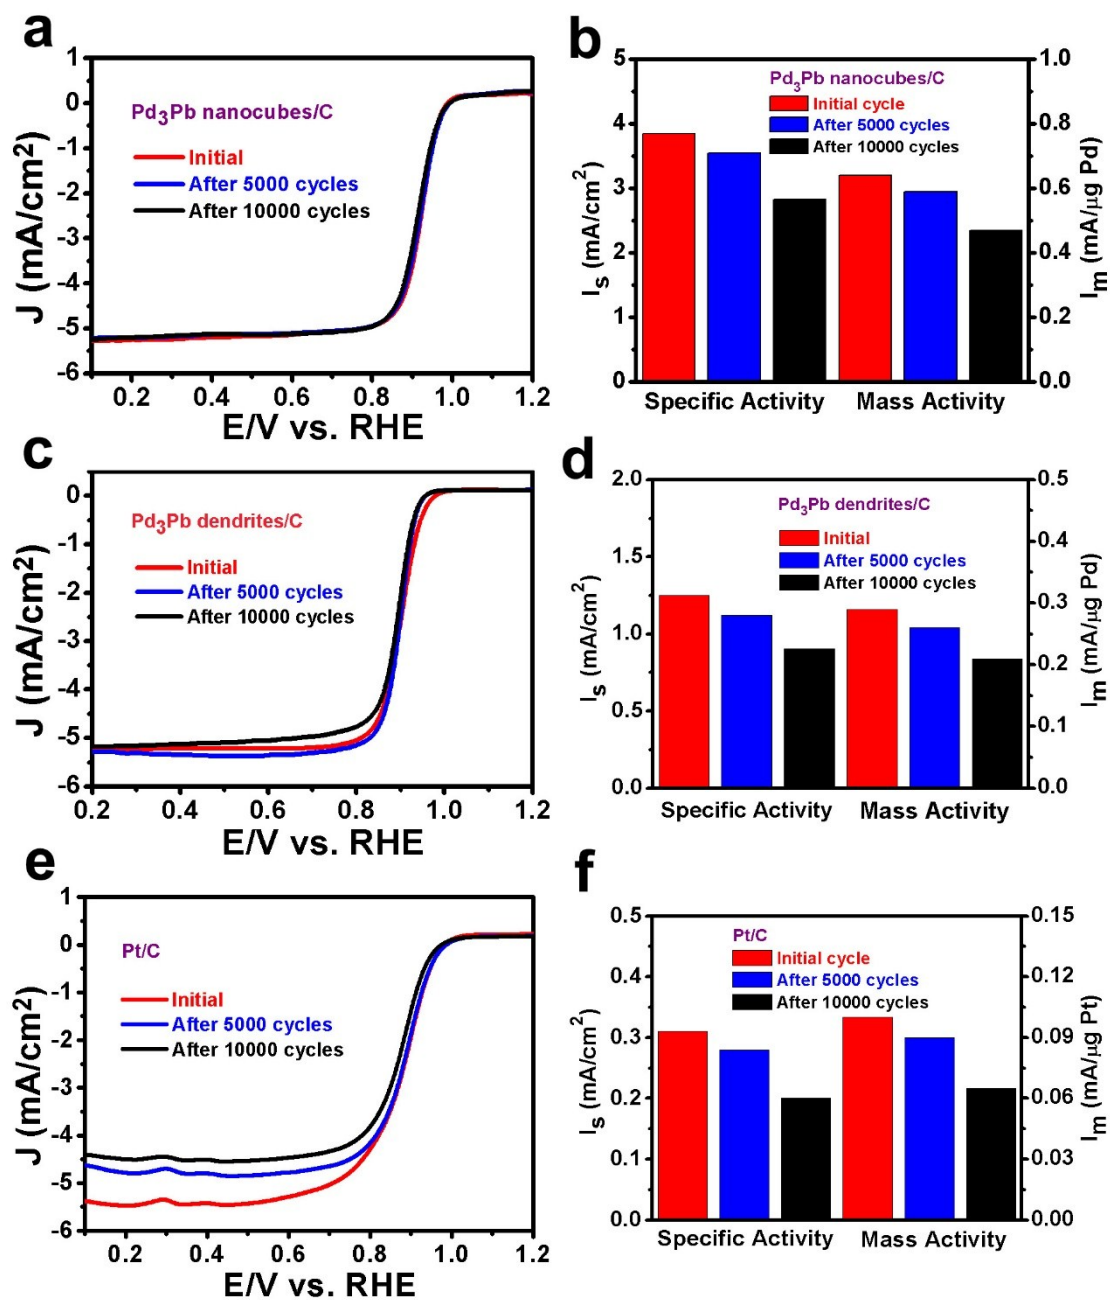

**Figure S11.** (a, c, e) ORR polarization curves of Pd<sub>3</sub>Pb nanocubes/C, Pd<sub>3</sub>Pb dendrites/C and commercial Pt/C in O<sub>2</sub>-saturated 0.1 M KOH before and after different potential cycles between 0.6 and 1.0 V versus RHE, respectively. (b, d, f) The changes on specific and mass activities of the Pd<sub>3</sub>Pb nanocubes/C and Pt/C after various potential cycles between 0.6 and 1.0 V versus RHE, respectively.

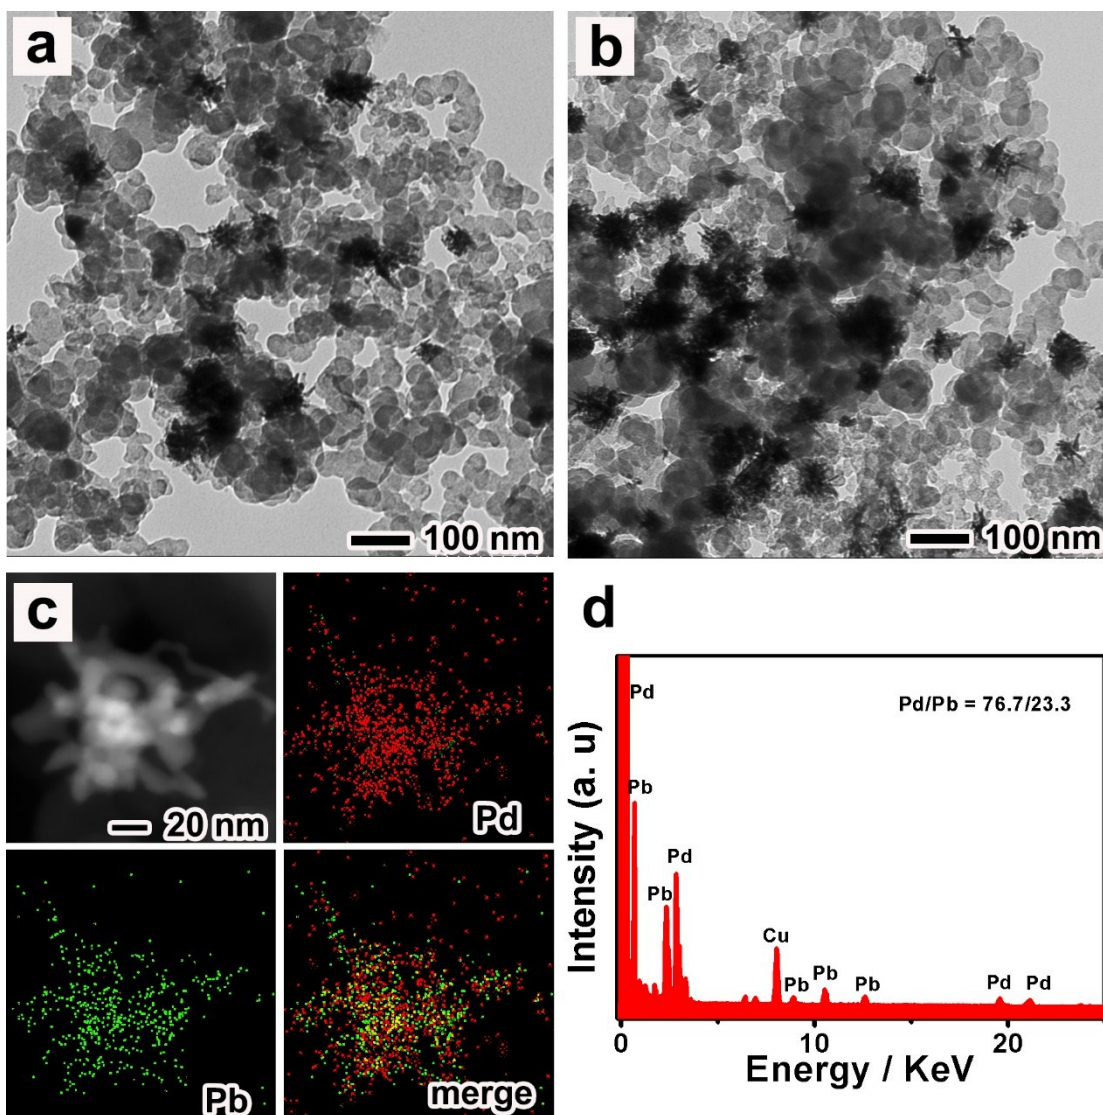

**Figure S12.** Representative TEM images of the Pd<sub>3</sub>Pb nanoflowers/C (a) before and (b) after ADT. (c) HADDF-STEM-EDX mapping image and (d) EDX spectrum of the Pd<sub>3</sub>Pb nanoflowers/C after 10000 cycles between 0.6 and 1.0 V versus RHE in O<sub>2</sub>-saturated 0.1M KOH solution.

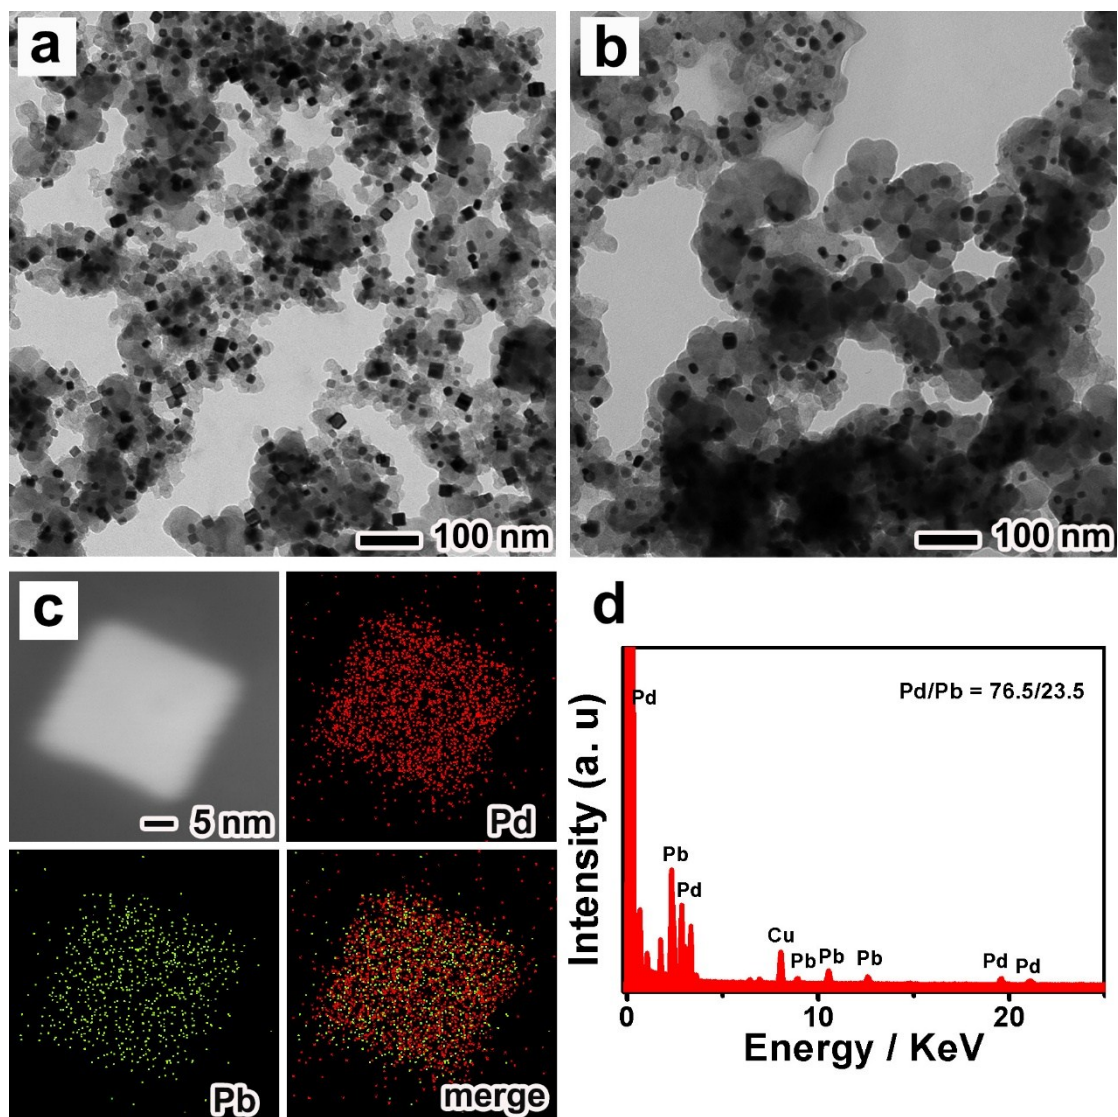

**Figure S13.** Representative TEM images of the intermetallic Pd<sub>3</sub>Pb nanocubes/C (a) before and (b) after ADT. (c) HADDF-STEM-EDX mapping image and (d) EDX spectrum of the intermetallic Pd<sub>3</sub>Pb nanocubes after 10000 cycles between 0.6 and 1.0 V versus RHE in O<sub>2</sub>-saturated 0.1M KOH solution.

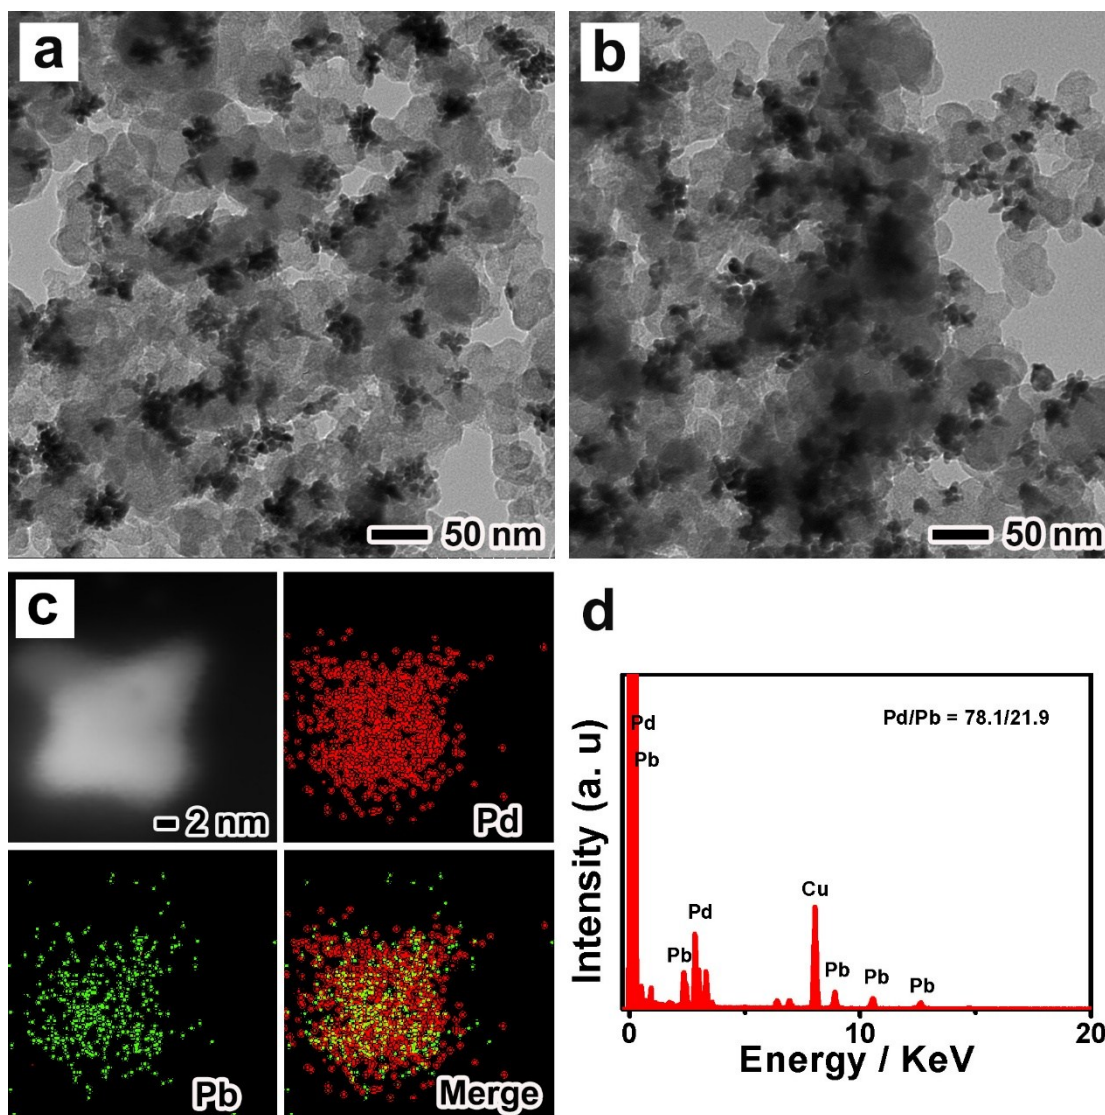

**Figure S14.** Representative TEM images of the intermetallic Pd<sub>3</sub>Pb dendrites/C (a) before and (b) after ADT. (c) HADDF-STEM-EDX mapping image and (d) EDX spectrum of the intermetallic Pd<sub>3</sub>Pb dendrites after 10000 cycles between 0.6 and 1.0 V versus RHE in O<sub>2</sub>-saturated 0.1M KOH solution.

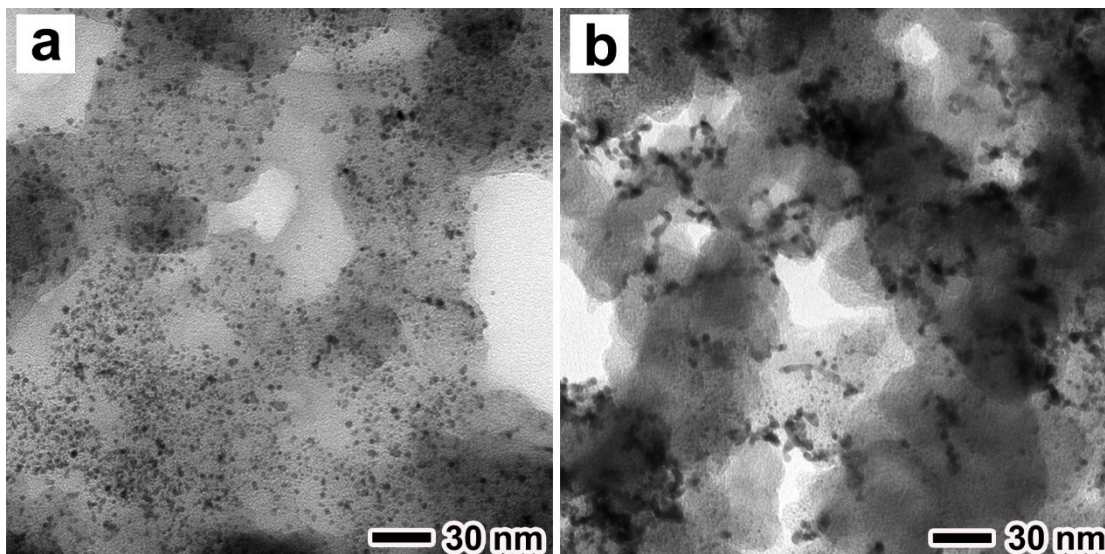

**Figure S15.** Representative TEM images of the commercial Pt/C (a) before and (b) after 10000 potential cycles between 0.6 and 1.0 V versus RHE in O<sub>2</sub>-saturated 0.1M KOH solution.



**Table S1.** ORR mass activities at 0.9 V vs. RHE in 0.1 M KOH of the Pd<sub>3</sub>Pb nanoflowers/C in this work and various excellent Pd-based nanocatalysts recorded in the literatures to date. (NA: Not available)

| No. | Catalysts                                  | Mass activities (mA/μg <sub>Pd</sub> ) | Specific Activities (mA/cm <sup>2</sup> ) | Reference        |
|-----|--------------------------------------------|----------------------------------------|-------------------------------------------|------------------|
| 1   | <b>Pd<sub>3</sub>Pb nanoflowers/C</b>      | <b>1.14</b>                            | <b>4.47</b>                               | <b>This work</b> |
| 2   | Pd <sub>3</sub> Pb nanoplates              | 0.78                                   | NA                                        | Ref. 1           |
| 3   | Pd <sub>3</sub> Pb nanowire networks       | 0.61                                   | 15.7                                      | Ref. 2           |
| 4   | Pd <sub>3</sub> Pb tripods                 | 0.56                                   | 1.76                                      | Ref. 3           |
| 5   | Ordered Pd <sub>3</sub> Pb/C               | 0.1689                                 | NA                                        | Ref. 4           |
| 6   | Ordered Pd <sub>3</sub> Fe/C               | 0.0974                                 | NA                                        | Ref. 5           |
| 7   | PdCuCo NPs/C-375 °C                        | 0.13                                   | NA                                        | Ref. 6           |
| 8   | Pd/W <sub>18</sub> O <sub>49</sub> hybrids | 0.216                                  | 0.45                                      | Ref. 7           |
| 9   | AuPdCo/C intermetallic                     | 0.13                                   | NA                                        | Ref. 8           |
| 10  | PdCu tetrapods                             | 0.29                                   | 0.73                                      | Ref. 9           |
| 11  | Pd <sub>6</sub> Ni icosahedra              | 0.22                                   | 0.66                                      | Ref. 10          |
| 12  | Ni@Pd <sub>3</sub> /C                      | 0.038                                  | 0.13                                      | Ref. 11          |
| 13  | Pd <sub>4</sub> Fe nanoflowers/C           | 0.975                                  | 2.78                                      | Ref. 12          |

- (1) K. Wang, Y. Qin, F. Lv, M. Li, Q. Liu, F. Lin, J. Feng, C. Yang, P. Gao, and S. Guo, *Small Methods*, 2018, **2**, 1700331.
- (2) Q. Shi, C. Zhu, C. Bi, H. Xia, M. Engelhard, D. Du, and Y. Lin, *J. Mater. Chem. A*, 2017, **5**, 23952-23959.
- (3) L. Bu, Q. Shao, Y. Pi, J. Yao, M. Luo, J. Lang, S. Hwang, H. Xin, B. Huang, J. Guo, D. Su, S. Guo, and X. Huang, *Chem*, 2018, **4**, 359-371.
- (4) Z. Cui, H. Chen, M. Zhao, and F. DiSalvo, *Nano Lett.*, 2016, **16**, 2560-2566.
- (5) Z. Cui, L. Li, A. Manthiram, and J. Goodenough, *J. Am. Chem. Soc.*, 2015, **137**, 7278-7281.
- (6) K. Jiang, P. Wang, S. Guo, X. Zhang, X. Shen, G. Lu, D. Su, and X. Huang, *Angew. Chem. Int. Ed.*, 2016, **55**, 9030-9035.
- (7) Y. Lu, Y. Jiang, X. Gao, X. Wang, and W. Chen, *J. Am. Chem. Soc.*, 2014, **136**,

11687-11697.

- (8) K. Kuttiyiel, K. Sasaki, D. Su, L. Wu, Y. Zhu & R. Adzic, *Nat. Commun.*, 2014, **5**, 5185.
- (9) L. Zhang, S. Chen, Y. Dai, Z. Shen, M. Wei, R. Huang, H. Li, T. Zheng, Y. Zhang, S. Zhou, and J. Zeng, *ChemCatChem*, 2018, **10**, 925-930.
- (10) Y. Feng, Q. Shao, Y. Ji, X. Cui, Y. Li, X. Zhu, X. Huang, *Sci. Adv.*, 2018, **4**, 8817
- (11) J. Jiang, H. Gao, S. Lu, X. Zhang, C. Wang, W. Wang, and H. Yu, *J. Mater. Chem. A*, 2017, **5**, 9233-9240.
- (12) C. Lian, Y. Cheng, L. Chen, X. Han, X. Lei, Y. Liu, and Y. Wang, *Chem. Commun.*, 2018, **54**, 7058-7061.
